# Supplementary material
Source: PubMed Central journal article supplement (PMC5156566)
Supplement: NIHMS1219-supplement-Appearance_pituitary_factor_Pit-1_Suppl_Table1.pdf [file NIHMS1219-supplement-Appearance_pituitary_factor_Pit-1_Suppl_Table1.pdf]

**Supplementary Table 1. Oligonucleotides.**

| <b>Name</b>     | <b>Sequence (5' - 3')</b>                          |
|-----------------|----------------------------------------------------|
| GHp Pit-1       | CACCTGTTTCTGTGTACATTTATGCATGGGGCCACTGACG           |
| Oct-1 consensus | TGTCGAATGCAAATCACTAGAA                             |
| Oct-1m          | TGTCGAATGCA <u>AG</u> CCACTAGAA                    |
| Oct-1 a (OLEa)  | CCAACCACCACCAGAGGGGAAGCAGA                         |
| Oct-1 b (OLEb)  | GGTTTATGTGGTGT <u>TT</u> TATGGGTGGT                |
| Oct-1 c (OLEc)  | TCAGTTTGGGGAAGATCCACTCAGG                          |
| Oct-1 d (OLEd)  | CTGGAGAGCGGAAGTGGCAGGTAAACACAG                     |
| HS III (41 bp)  | CCACTCAGGCCCTGGAGAGCGGAAGTGGCAGGTAAACACAG          |
| HS III m        | CCACTCAGGCCCTGGAGAGCT <u>CG</u> CTGAGCAGGTAAACACAG |

Mutated sequences are indicated by underlining.
