# Supplementary material
Source: PubMed Central journal article supplement (PMC5156566)
Supplement: NIHMS1219-supplement-Appearance_pituitary_factor_Pit-1_Suppl_Table2.pdf [file NIHMS1219-supplement-Appearance_pituitary_factor_Pit-1_Suppl_Table2.pdf]

**Supplementary Table 2. PCR primers.**

| <b>Name</b>    | <b>Sequence (5' - 3')</b>        |
|----------------|----------------------------------|
| HS III (F)     | TGCGTCAAGCTTGGGCACTGTCCCGATTCGAG |
| HS III (R)     | AGGCTCGAGCTCGGGTGCAGGCACCTTGTTTC |
| human GH-N (F) | CCTCTGACAGCAACGTCTATGA           |
| human GH-N (R) | GCAGCAGTGTTTCTCTAACACA           |
| human CS-A (F) | GGCTTCTAGGTGCCCGAGTA             |
| human CS-A (R) | GCACTGGAGTGGCACCTTCA             |
| human CS-B (F) | CCTCTGGTCCATGGTTACCAC            |
| human CS-B (R) | GGGGCAGGGAGCCCCCATGAC            |
| human GH-V (F) | CCTATGAGGACATAGTGACG             |
| human GH-V (R) | CAGAGAACTCCCTCCAAGTT             |
