# Supplementary material
Source: PubMed Central journal article supplement (PMC5156566)
Supplement: NIHMS1219-supplement-Appearance_pituitary_factor_Pit-1_Suppl_Table3.pdf [file NIHMS1219-supplement-Appearance_pituitary_factor_Pit-1_Suppl_Table3.pdf]

**Supplementary Table 3. Sequence-specific RT primers.**

| <b>Name</b>   | <b>Sequence (5' - 3')</b> |
|---------------|---------------------------|
| RT primer P1  | CACCAAGGTCTACGC           |
| RT primer P2  | GGTAGTGTGATGCTAC          |
| RT primer P3  | TCCGAGTCCATTTGC           |
| RT primer P4  | CAGGACCTGAGCCACGGAAG      |
| RT primer P5  | CAGCCCCATAGTGGGTCC        |
| RT primer P6  | GGGCACTGAGGAGCTTCG        |
| RT primer P7  | GGGGTTGGGTACAACG          |
| RT primer P8  | ATGGCCCCAACCGTGA          |
| RT primer P9  | AGCCAACAACAGCAA           |
| RT primer P10 | GGCACTTTGGCCCACT          |
| RT primer P11 | CCAGCTCAGCATTTTA          |
