# Supplementary material
Source: PubMed Central journal article supplement (PMC5156566)
Supplement: NIHMS1219-supplement-Appearance_pituitary_factor_Pit-1_Suppl_Table4.pdf [file NIHMS1219-supplement-Appearance_pituitary_factor_Pit-1_Suppl_Table4.pdf]

**Supplementary Table 4. PCR primers for the non-coding transcript analysis.**

| Name       |     | Sequence (5' - 3')                 |
|------------|-----|------------------------------------|
| P0/GAPDH   | (F) | GGTGTGAACCATGAGAAGT                |
| P0/GAPDH   | (R) | AGGGATGATGTTCTGGAGA                |
| P1/GH-N    | (F) | AGGCTTTTTGACAACGCTAT               |
| P1/GH-N    | (R) | CACTCAGCGTGTGCTCATCT               |
| P2/GHp     | (F) | CCTCTGGTCCATGGTTACCAC              |
| P2/GHp     | (R) | GGGGCAGGGAGCCCCCATGAC              |
| P3/CD79    | (F) | CCTATGAGGACATAGTGACG               |
| P3/CD79    | (R) | CAGAGAACTCCCTCCAAGTT               |
| P4/HS I/II | (F) | GATATCAAGCTTCCCAGGGTCAGTCTCTCTCCAG |
| P4/HS I/II | (R) | TAAGGTGAGCTCCGAGGAACAGCCCGTTCCG    |
| P5         | (F) | CTGAGGATTGCCAAGCCCAAC              |
| P5         | (R) | CATTCTCGTGGCCATACATC               |
| P6         | (F) | CACTCCCCACTTCAGGGTA                |
| P6         | (R) | GGGCAGGCAGCGACATCAT                |
| P7         | (F) | GCCGCAGTACGAGGTGAACC               |
| P7         | (R) | CCTGGCCCAGCAGTCTCATT               |
| P8         | (F) | CCTGGGTGGCGTAGAGATG                |
| P8         | (R) | GACCCACGTTGTCGTAGTTG               |
| P9/HS III  | (F) | GCATGTCTATACTCCAACCACCAC           |
| P9/HS III  | (R) | GGCACCTTGTTTCAAAGCCCTG             |
| P10        | (F) | GAGGAGTTTCTTACTTCATACA             |
| P10        | (R) | GGGGATCAGTGCGTGCAAGG               |
| P11/HS IV  | (F) | TCCCAGGGATCCGGGAAGAAGTGGTGGAC      |
| P11/HS IV  | (R) | CAAAGAAGCTTCCCACGTAATAAGGGAGGCAC   |
| P12/HS V   | (F) | CCATCCTCGAGCGAGCTGGACCACCTTAACTT   |
| P12/HS V   | (R) | CTAAACTCGAGTAGAGGATAAGTGTGAGGAC    |
| P13        | (F) | TAGCCTCCTAAGTCTTTCCG               |
| P13        | (R) | GTCGCCGAGCTTCCAGGACT               |
| P14        | (F) | GAGACCCGCCGAGGAGACG                |
| P14        | (R) | GGTGGCGTGGCCTGCTCTA                |
